# Supplementary material for: Suicides by persons reported as missing prior to death: a retrospective cohort study
Source: PubMed Central journal article supplement — BMJ Open. 2012 Mar 26;2(2):e000607. doi: 10.1136/bmjopen-2011-000607 (PMC3323803; doi:10.1136/bmjopen-2011-000607), 2012-03-26
Supplement: bmjopen-2011-000607-s3.pdf [file bmjopen-2011-000607-s3.pdf]

**Web Table 1 Proportion reporting none, one, two, three or four behaviours and mean number of behaviours in early and late adolescence within each cohort, with  $\beta$  (adjusted as appropriate) for the increase in means between 1987/1990 (the 'earlier' cohort) and 1999/2003 (the 'later' cohort), overall and among males vs females and those from non-manual vs manual backgrounds**

| Late adolescence substance and 3+ sexual partners |          |         |         |           |          |                   |                   |                                                    | Early adolescent substance use and early sexual initiation |          |         |         |           |          |                   |                   |                                                    |                |  |
|---------------------------------------------------|----------|---------|---------|-----------|----------|-------------------|-------------------|----------------------------------------------------|------------------------------------------------------------|----------|---------|---------|-----------|----------|-------------------|-------------------|----------------------------------------------------|----------------|--|
| Cohort                                            | None (%) | One (%) | Two (%) | Three (%) | Four (%) | Mean N behaviours | $\beta$ (p-value) | p-value cohort by gender/ social class interaction | Cohort                                                     | None (%) | One (%) | Two (%) | Three (%) | Four (%) | Mean N behaviours | $\beta$ (p-value) | p-value cohort by gender/ social class interaction |                |  |
|                                                   |          |         |         |           |          |                   |                   |                                                    |                                                            |          |         |         |           |          |                   |                   |                                                    | <b>Overall</b> |  |
| 1987/1990                                         | 42.6     | 24.4    | 17.2    | 11.0      | 4.7      | 1.10              | 0.34*             | -                                                  | 1987/1990                                                  | 57.2     | 26.2    | 10.1    | 4.8       | 1.7      | 0.67              | 0.81†             | -                                                  |                |  |
| 1999/2003                                         | 24.1     | 20.5    | 24.2    | 19.0      | 12.2     | 1.75              | (< 0.001)         |                                                    | 1999/2003                                                  | 26.7     | 26.0    | 22.0    | 15.7      | 9.6      | 1.55              | (<0.001)          |                                                    |                |  |
| <b>By gender</b>                                  |          |         |         |           |          |                   |                   |                                                    |                                                            |          |         |         |           |          |                   |                   |                                                    |                |  |
| <b>Males</b>                                      |          |         |         |           |          |                   |                   |                                                    |                                                            |          |         |         |           |          |                   |                   |                                                    |                |  |
| 1987/1990                                         | 32.5     | 20.6    | 19.4    | 19.1      | 8.4      | 1.50              | 0.12‡             | <0.001                                             | 1987/1990                                                  | 51.3     | 24.9    | 13.4    | 7.4       | 2.9      | 0.84              | 0.59§             | <0.001                                             |                |  |
| 1999/2003                                         | 17.4     | 21.2    | 25.2    | 22.7      | 13.5     | 1.93              | (0.048)           |                                                    | 1999/2003                                                  | 26.3     | 26.1    | 23.7    | 15.0      | 8.9      | 1.55              | (<0.001)          |                                                    |                |  |
| <b>Females</b>                                    |          |         |         |           |          |                   |                   |                                                    |                                                            |          |         |         |           |          |                   |                   |                                                    |                |  |
| 1987/1990                                         | 51.7     | 27.9    | 15.3    | 3.8       | 1.5      | 0.75              | 0.65‡             |                                                    | 1987/1990                                                  | 62.3     | 27.2    | 7.2     | 2.6       | 0.6      | 0.51              | 1.08§             |                                                    |                |  |
| 1999/2003                                         | 30.7     | 19.7    | 23.2    | 15.4      | 11.0     | 1.56              | (< 0.001)         | 1999/2003                                          | 27.2                                                       | 25.9     | 20.3    | 16.3    | 10.2      | 1.56     | (< 0.001)         |                   |                                                    |                |  |
| <b>By social class</b>                            |          |         |         |           |          |                   |                   |                                                    |                                                            |          |         |         |           |          |                   |                   |                                                    |                |  |
| <b>Non-manual</b>                                 |          |         |         |           |          |                   |                   |                                                    |                                                            |          |         |         |           |          |                   |                   |                                                    |                |  |
| 1987/1990                                         | 46.4     | 22.2    | 16.4    | 10.0      | 5.0      | 1.05              | 0.27¶             | 0.155                                              | 1987/1990                                                  | 58.9     | 26.5    | 10.1    | 2.9       | 1.6      | 0.61              | 0.75**            | 0.281                                              |                |  |
| 1999/2003                                         | 29.0     | 22.4    | 22.0    | 17.6      | 9.0      | 1.56              | (< 0.001)         |                                                    | 1999/2003                                                  | 32.8     | 27.1    | 21.3    | 12.2      | 6.6      | 1.33              | (<0.001)          |                                                    |                |  |
| <b>Manual</b>                                     |          |         |         |           |          |                   |                   |                                                    |                                                            |          |         |         |           |          |                   |                   |                                                    |                |  |
| 1987/1990                                         | 39.9     | 26.1    | 17.9    | 11.8      | 4.3      | 1.14              | 0.40¶             |                                                    | 1987/1990                                                  | 55.8     | 26.0    | 10.2    | 6.3       | 1.8      | 0.71              | 0.85**            |                                                    |                |  |
| 1999/2003                                         | 20.0     | 19.0    | 26.2    | 20.0      | 14.8     | 1.90              | (< 0.001)         | 1999/2003                                          | 21.9                                                       | 25.1     | 22.9    | 18.3    | 11.8      | 1.73     | (<0.001)          |                   |                                                    |                |  |

\* Adjusted for age, gender and class.

† Adjusted for gender and class.

‡ Adjusted for age and class.

§ Adjusted for class.

¶ Adjusted for age and gender.

\*\* Adjusted for gender.
