# Supplementary material for: Suicides by persons reported as missing prior to death: a retrospective cohort study
Source: PubMed Central journal article supplement — BMJ Open. 2012 Mar 26;2(2):e000607. doi: 10.1136/bmjopen-2011-000607 (PMC3323803; doi:10.1136/bmjopen-2011-000607), 2012-03-26
Supplement: bmjopen-2011-000607-s4.pdf [file bmjopen-2011-000607-s4.pdf]

## **Web Appendix Description of the past-week drinking grids and lists of illicit drugs provided to respondents**

### **Drinking grids**

At age 18-19, both studies included past-week drinking grids to measure alcohol use. In the 1987/1990 study this asked about: pints, glasses, bottles and measures of beer, lager, shandy, stout and cider; wine; fortified wine; spirits; and other drinks. The grid in the 1999/2003 study was more detailed and asked about: pints, small, large and very large cans and bottles and small and large glasses of shandy; normal or strong beer, lager or stout; normal or strong cider; babycham; wine or champagne; cocktails, mixers, breezers or alcopops; spirits or liqueurs; (flavoured) schnapps; buckfast, eldorado or sanotogen; sherry, martini, taboo or port; MD20/20; and other drinks.

### **Illicit drugs lists**

At age 15 ('early adolescence'), respondents in both studies were provided with the following list of illicit drugs: cannabis; LSD; barbiturates; glues, solvents, dry-cleaning fluids; fuels or gas; amphetamines; opium; morphine; heroin; cocaine; crack; PCP; magic mushrooms. The 1987/1990 study age 15 list also included barbiturates; opium; morphine; and PCP. The 1999/2003 study age 15 list also included temazepam and ecstasy.

At age 18-19 ('late adolescence'), respondents in both cohorts were provided with the following list, comprising: cannabis; LSD; temazepam; tranquillisers; glues, sprays, gas, dry cleaning fluid; amphetamine; amyl or butile nitrite; heroin; methadone; temgesic; cocaine; crack; ecstasy; magic mushrooms; morphine or opium. The list given to the 1987/1990 cohort also included other barbiturates and PCP.
